# Supplementary material for: A Random Screen Using a Novel Reporter Assay System Reveals a Set of Sequences That Are Preferred as the TATA or TATA-Like Elements in the CYC1 Promoter of Saccharomyces cerevisiae
Source: PLoS One. 2015 Jun 5;10(6):e0129357. doi: 10.1371/journal.pone.0129357 (PMC4457894; doi:10.1371/journal.pone.0129357)
Supplement: S3 Table — (XLSX) [file pone.0129357.s010.xlsx]

## Sheet: Sheet1
S3 Table PCR primers used for the construction of yeast strains in this study
					1st step												2nd step
	TATA				VTC1(5')			His3MX6			CYC1 promoter			VTC1(3')	seq		fused fragment	clone	host
strain	#1	#2	#3	#4	sense	anti-sense	template	sense	anti-sense	template	sense	anti-sense	template	sense	anti-sense	template	sense	anti-sense
YTK7548	b	a	WT	WT	TK7872	TK7873	BY4741	TK8297	TK10263	pFA6a-His3MX6	TK10036	TK10037	BY4741	TK9030	TK7875	BY4741	TK7872	TK7875	BY4741
	TATA				5'-region			middle region			3'-region			N/A			fused fragment	clone	host
strain	#1	#2	#3	#4	sense	anti-sense	template	sense	anti-sense	template	sense	anti-sense	template	sense	anti-sense	template	sense	anti-sense
YTK7550	b	a	mut	mut	TK7872	TK10038	YTK7548				TK10254	TK7875	YTK7548				TK2496	TK9044	BY4741
YTK7554	b	mut	mut	mut	TK2496	TK10257	YTK7550				TK10258	TK9044	YTK7550				TK2496	TK9044
YTK7558	mut	mut	mut	mut	TK2496	TK10255	YTK7550	TK10256	TK10257	YTK7550	TK10258	TK9044	YTK7550				TK2496	TK9044
YTK7560	mut	a	mut	mut	TK10267	TK10255	YTK7550				TK10256	TK4283	YTK7550				TK10267	TK4283
YTK7563	a	a	mut	mut	TK10267	TK10255	YTK7550				TK10696	TK4283	YTK7550				TK10267	TK4283
YTK7565	b	b	mut	mut	TK10267	TK10257	YTK7550				TK10697	TK4283	YTK7550				TK10267	TK4283
YTK7567	a'	a	mut	mut	TK10267	TK10255	YTK7563				TK10709	TK4283	YTK7563				TK10267	TK4283
YTK7569	b	b'	mut	mut	TK10267	TK10257	YTK7565				TK10710	TK4283	YTK7565				TK10267	TK4283
YTK7796	a'	b	mut	mut	TK10267	TK10255	YTK7565				TK10709	TK4283	YTK7565				TK10267	TK4283
YTK7798	a	mut	mut	mut	TK10267	TK10257	YTK7563				TK10258	TK4283	YTK7563				TK10267	TK4283
YTK7800	mut	b	mut	mut	TK10267	TK10255	YTK7565				TK10256	TK4283	YTK7565				TK10267	TK4283
YTK16302	a'	b'	mut	mut	TK10267	TK10257	YTK7567				TK10710	TK4283	YTK7567				TK10267	TK4283
YTK16303	a'	mut	mut	mut	TK10267	TK10257	YTK7567				TK10258	TK4283	YTK7567				TK10267	TK4283
YTK16304	mut	b'	mut	mut	TK10267	TK10255	YTK7569				TK10256	TK4283	YTK7569				TK10267	TK4283
frame 1	mut	random	mut	mut	TK10267	TK10257	YTK7560				TK11272	TK4283	YTK7560				TK10267	TK4283
frame 2	mut	random	mut	mut	TK10267	TK10257	YTK7560				TK12044	TK4283	YTK7560				TK10267	TK4283
frame 3	mut	random	mut	mut	TK10267	TK10257	YTK7560				TK11835	TK4283	YTK7560				TK10267	TK4283
frame 4	mut	random	mut	mut	TK10267	TK10257	YTK7560				TK12045	TK4283	YTK7560				TK10267	TK4283
frame 5	mut	random	mut	mut	TK10267	TK10257	YTK7560				TK10262	TK4283	YTK7560				TK10267	TK4283
frame 6	mut	random	mut	mut	TK10267	TK10257	YTK7560				TK12046	TK4283	YTK7560				TK10267	TK4283
frame 7	mut	random	mut	mut	TK10267	TK10257	YTK7560				TK11836	TK4283	YTK7560				TK10267	TK4283
frame 8	mut	random	mut	mut	TK10267	TK10257	YTK7560				TK11910	TK4283	YTK7560				TK10267	TK4283
frame 9	mut	random	mut	mut	TK10267	TK10257	YTK7560				TK10261	TK4283	YTK7560				TK10267	TK4283
	TATA				VTC1(5')			LEU2			CYC1 promoter+VTC1(3')			N/A			fused fragment	clone	host
strain	#1	#2	#3	#4	sense	anti-sense	template	sense	anti-sense	template	sense	anti-sense	template	sense	anti-sense	template	sense	anti-sense
YTK16455	b	a	WT	WT	TK10267	TK7873	BY4741	TK12262	TK6582	pUG73	TK10036	TK4283	YTK7548				TK10267	TK4283	YTK2741
YTK16456	b	a	WT	WT	TK10267	TK7873	BY4741	TK12262	TK6582	pUG73	TK10036	TK4283	YTK7548				TK10267	TK4283	YTK3778
YTK16457	b	a	mut	mut	TK10267	TK7873	BY4741	TK12262	TK6582	pUG73	TK10036	TK4283	YTK7550				TK10267	TK4283	YTK2741
YTK16458	b	a	mut	mut	TK10267	TK7873	BY4741	TK12262	TK6582	pUG73	TK10036	TK4283	YTK7550				TK10267	TK4283	YTK3778
YTK16459	b	mut	mut	mut	TK10267	TK7873	BY4741	TK12262	TK6582	pUG73	TK10036	TK4283	YTK7554				TK10267	TK4283	YTK2741
YTK16460	b	mut	mut	mut	TK10267	TK7873	BY4741	TK12262	TK6582	pUG73	TK10036	TK4283	YTK7554				TK10267	TK4283	YTK3778
YTK16396	mut	a	mut	mut	TK10267	TK7873	BY4741	TK12262	TK6582	pUG73	TK10036	TK4283	YTK7560				TK10267	TK4283	YTK2741
YTK16397	mut	a	mut	mut	TK10267	TK7873	BY4741	TK12262	TK6582	pUG73	TK10036	TK4283	YTK7560				TK10267	TK4283	YTK3778
YTK16398	mut	mut	mut	mut	TK10267	TK7873	BY4741	TK12262	TK6582	pUG73	TK10036	TK4283	YTK7558				TK10267	TK4283	YTK2741
YTK16399	mut	mut	mut	mut	TK10267	TK7873	BY4741	TK12262	TK6582	pUG73	TK10036	TK4283	YTK7558				TK10267	TK4283	YTK3778
					VTC1(5')+His3MX6			N/A			ADE5,7 promoter			VTC1(3')			fused fragment	clone	host
strain	TATA-like				sense	anti-sense	template	sense	anti-sense	template	sense	anti-sense	template	sense	anti-sense	template	sense	anti-sense
YTK16418	TATTTAAA				TK8260	TK10263	YTK7560				TK12324	TK12361	BY4741	TK9030	TK4283	BY4741	TK8260	TK4283	BY4741
YTK16419	CGCCCGGG										TK8260	TK12327	YTK16418	TK12306	TK4283	YTK16418	TK8260	TK4283
					VTC1(5')+His3MX6			N/A			ADE6 promoter			VTC1(3')			fused fragment	clone	host
strain	TATA-like				sense	anti-sense	template	sense	anti-sense	template	sense	anti-sense	template	sense	anti-sense	template	sense	anti-sense
YTK16421	TATTTAAA				TK8260	TK10263	YTK7560				TK12325	TK12362	BY4741	TK9030	TK4283	BY4741	TK8260	TK4283	BY4741
YTK16422	CGCCCGGG										TK8260	TK12326	YTK16421	TK12310	TK4283	YTK16421	TK8260	TK4283
